# Supplementary material
Source: HighWire-hosted journal article supplement (https://www.life-science-alliance.org/content/5/12/e202201663/F4)

**Fig 4C(i)**

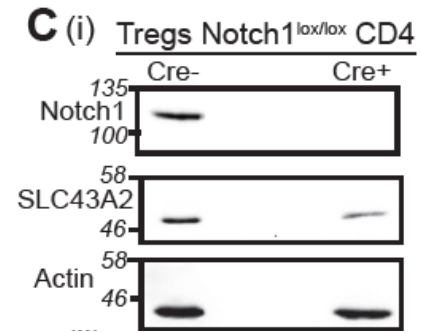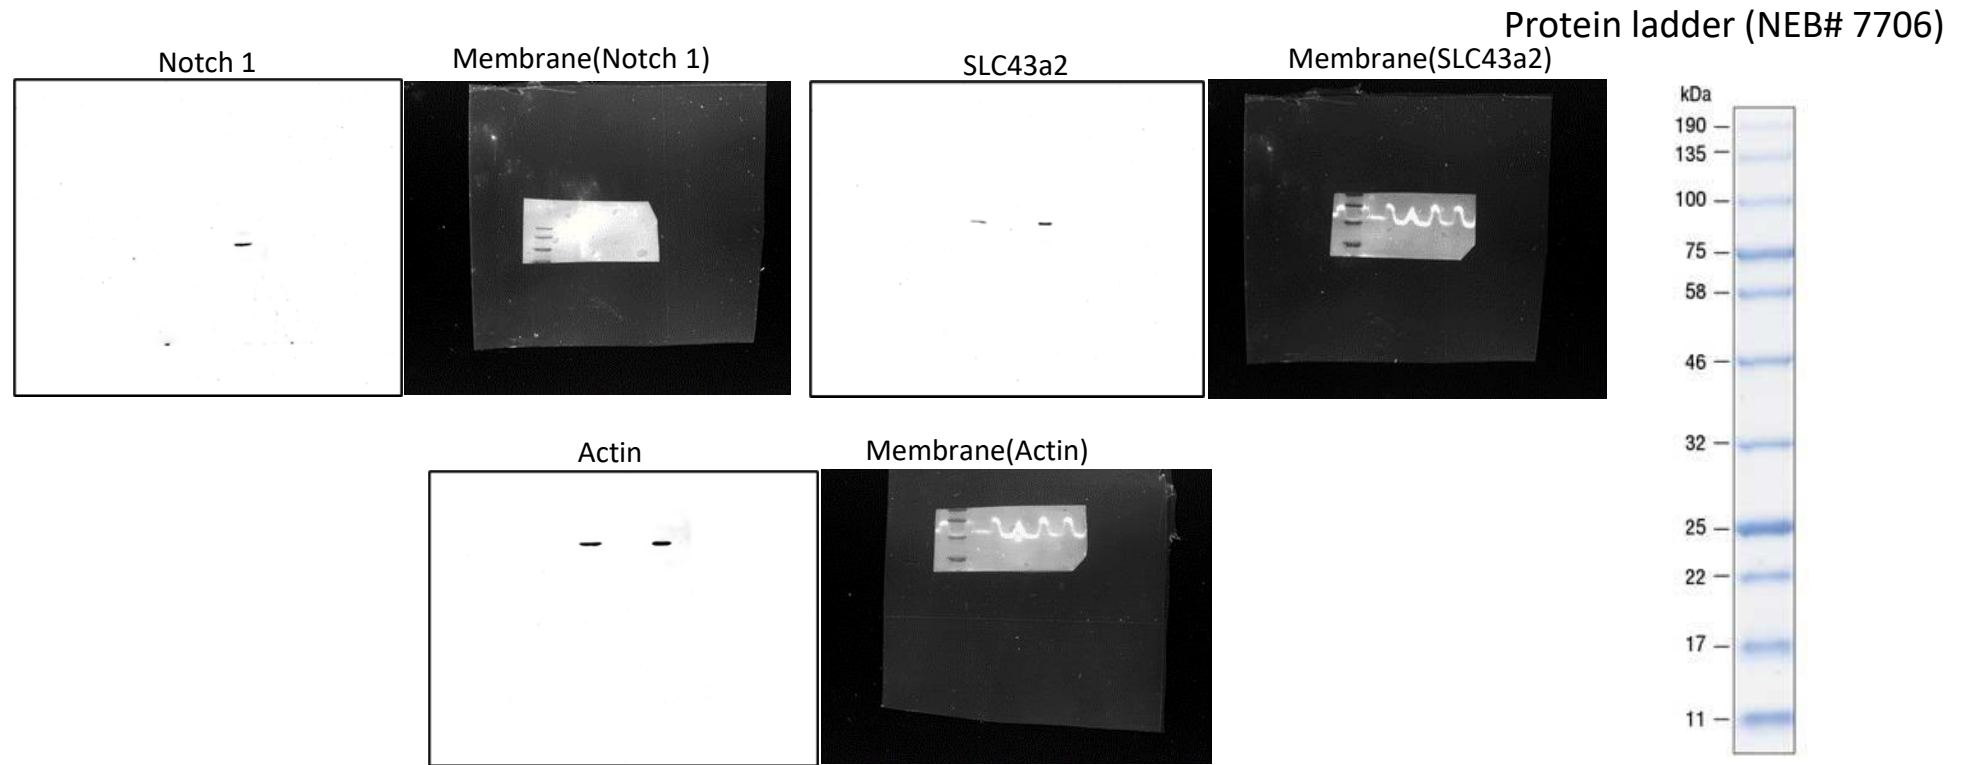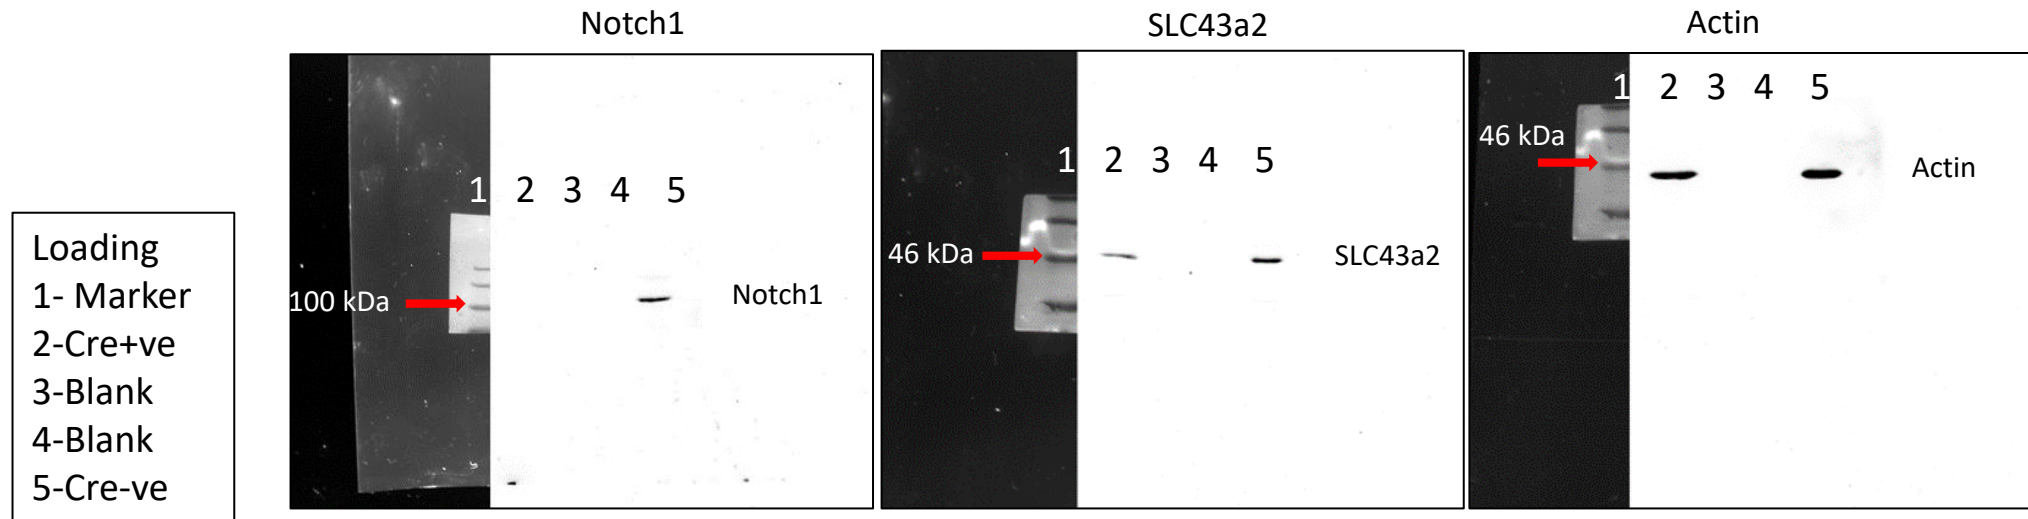

Fig 4Cii

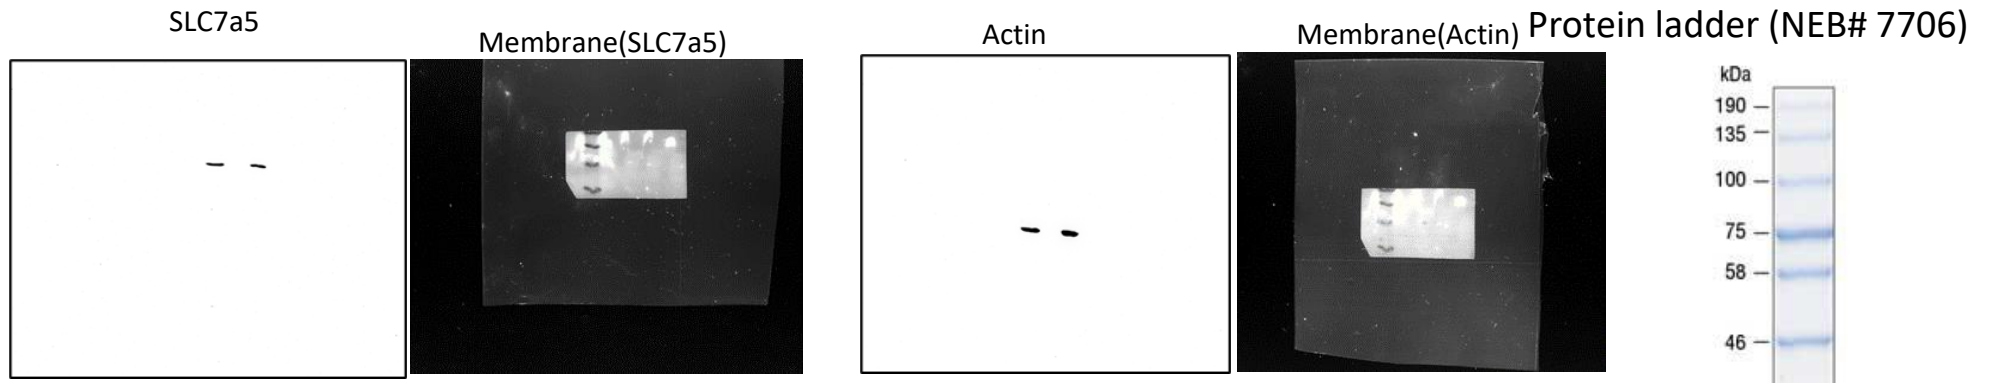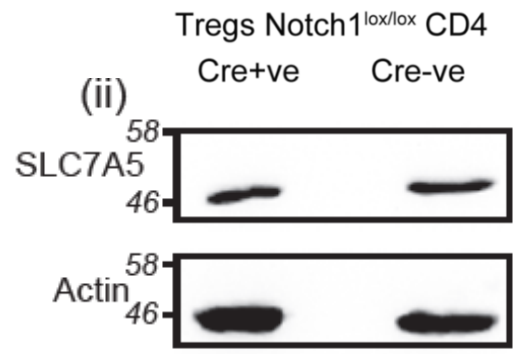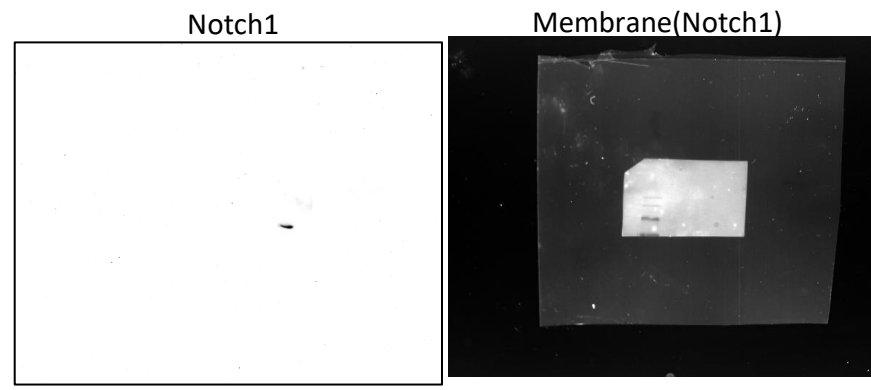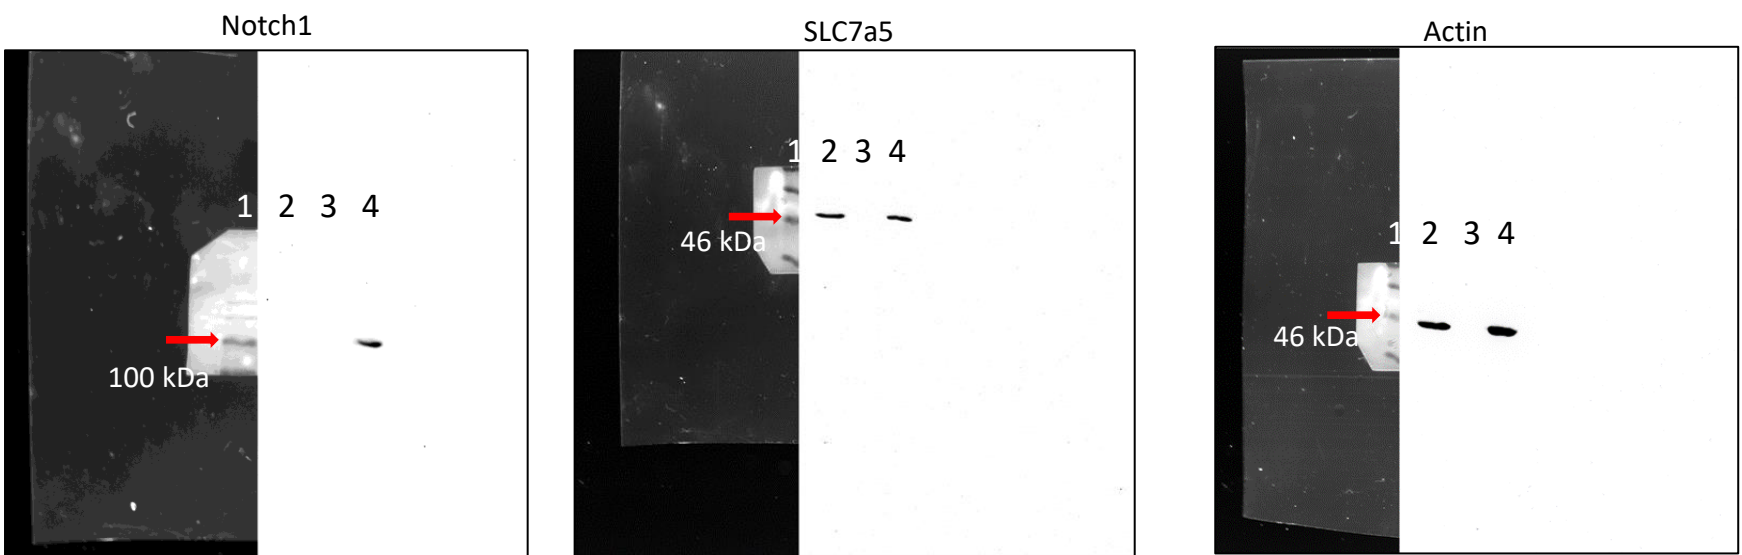

Loading  
1- Marker  
2-Cre+ve  
3-Blank  
4-Cre-ve

**Fig 4D**

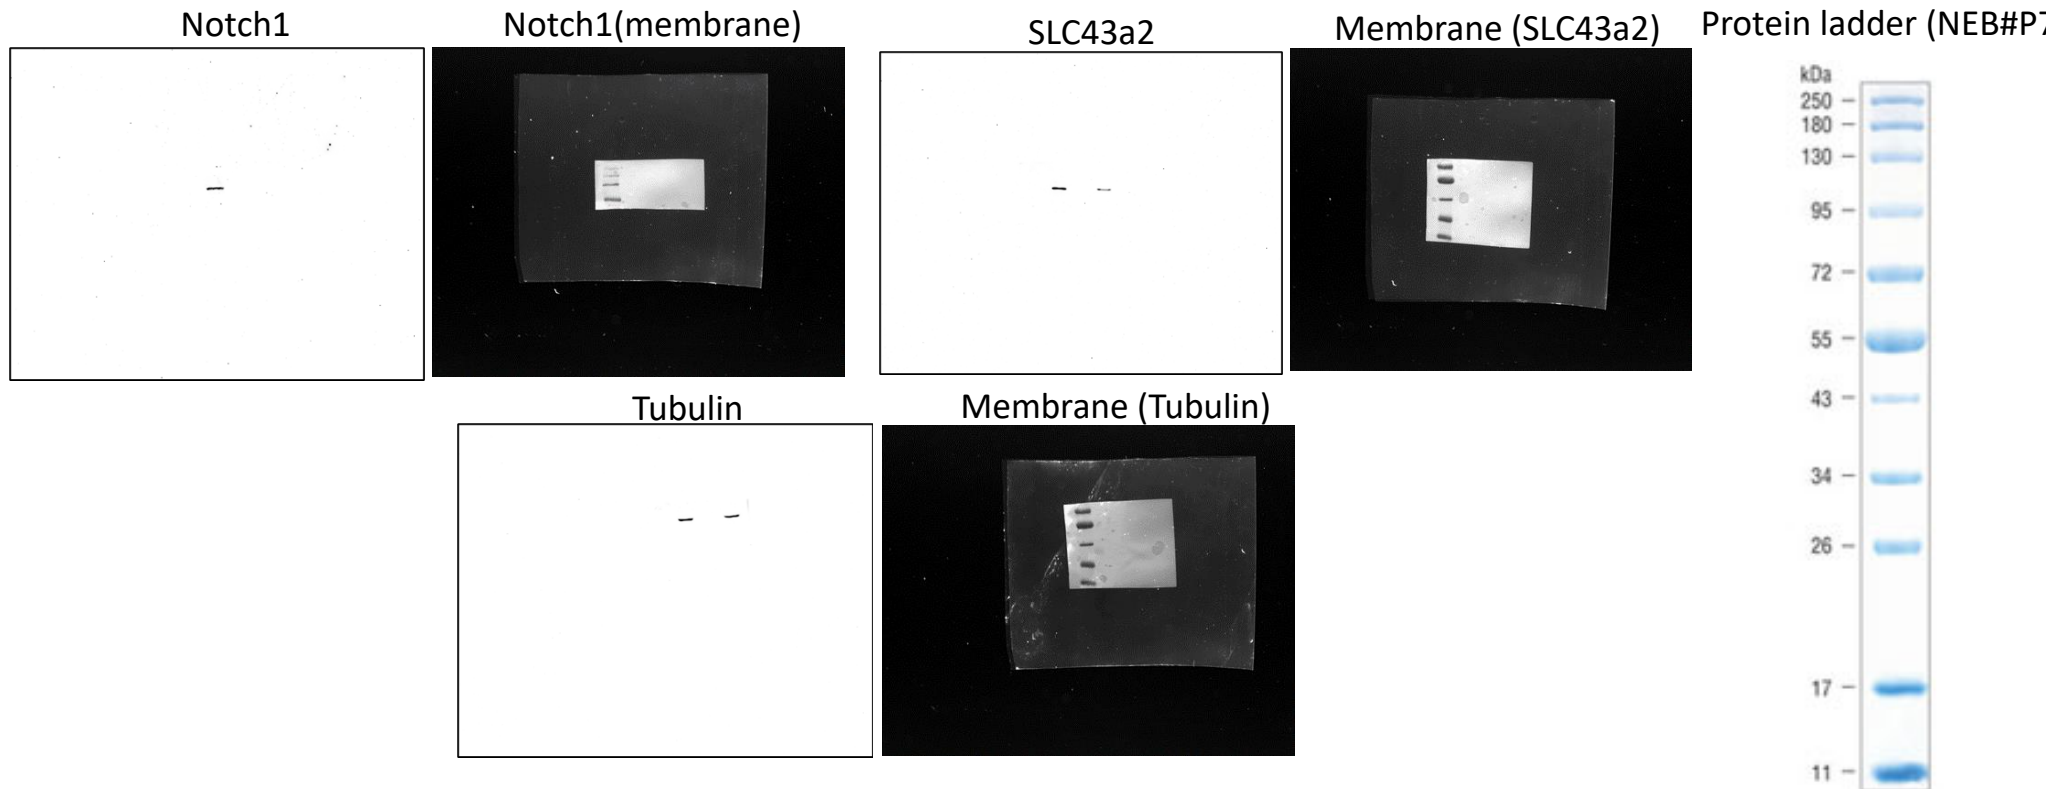

**D** Tregs Notch1<sup>lox/lox</sup> CD4

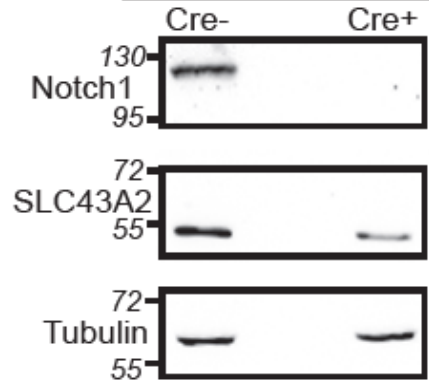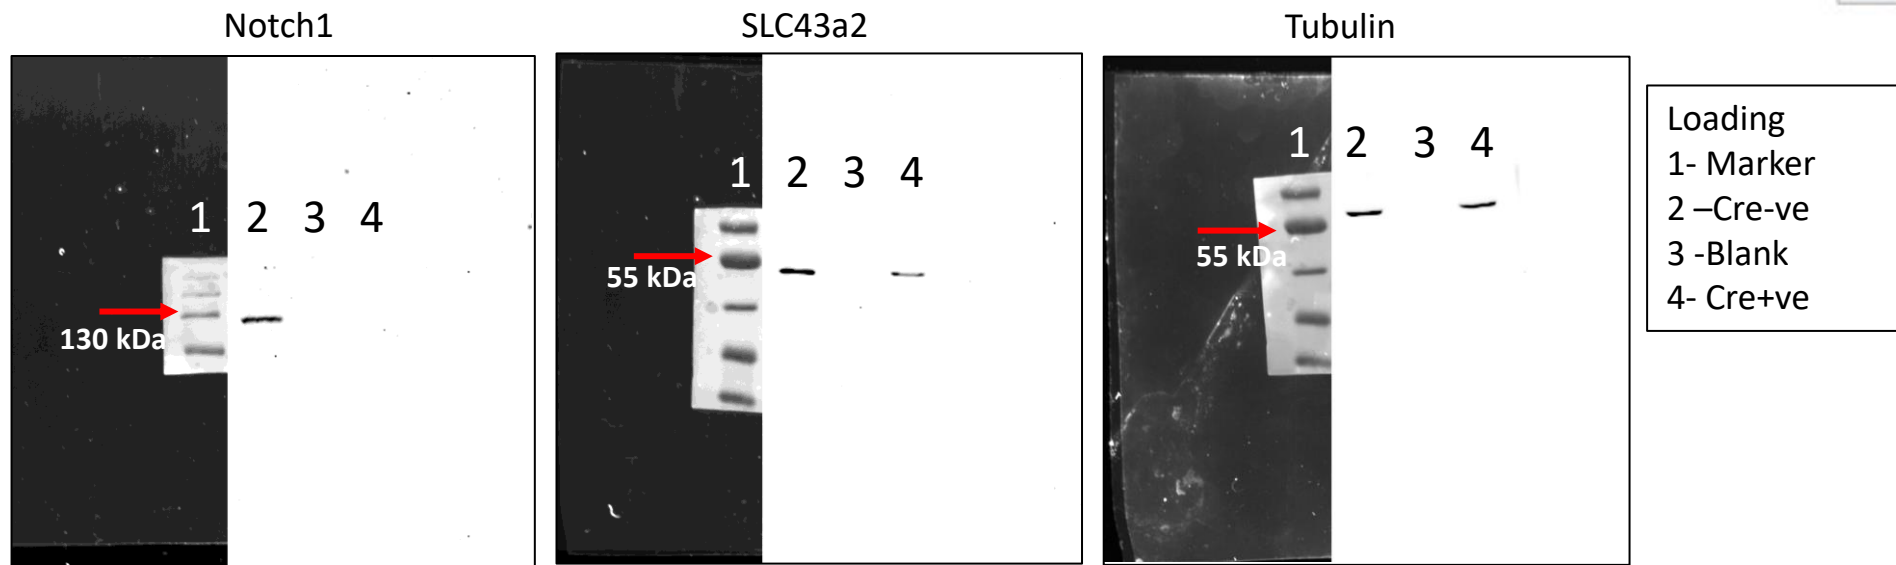

**Figure 4E**

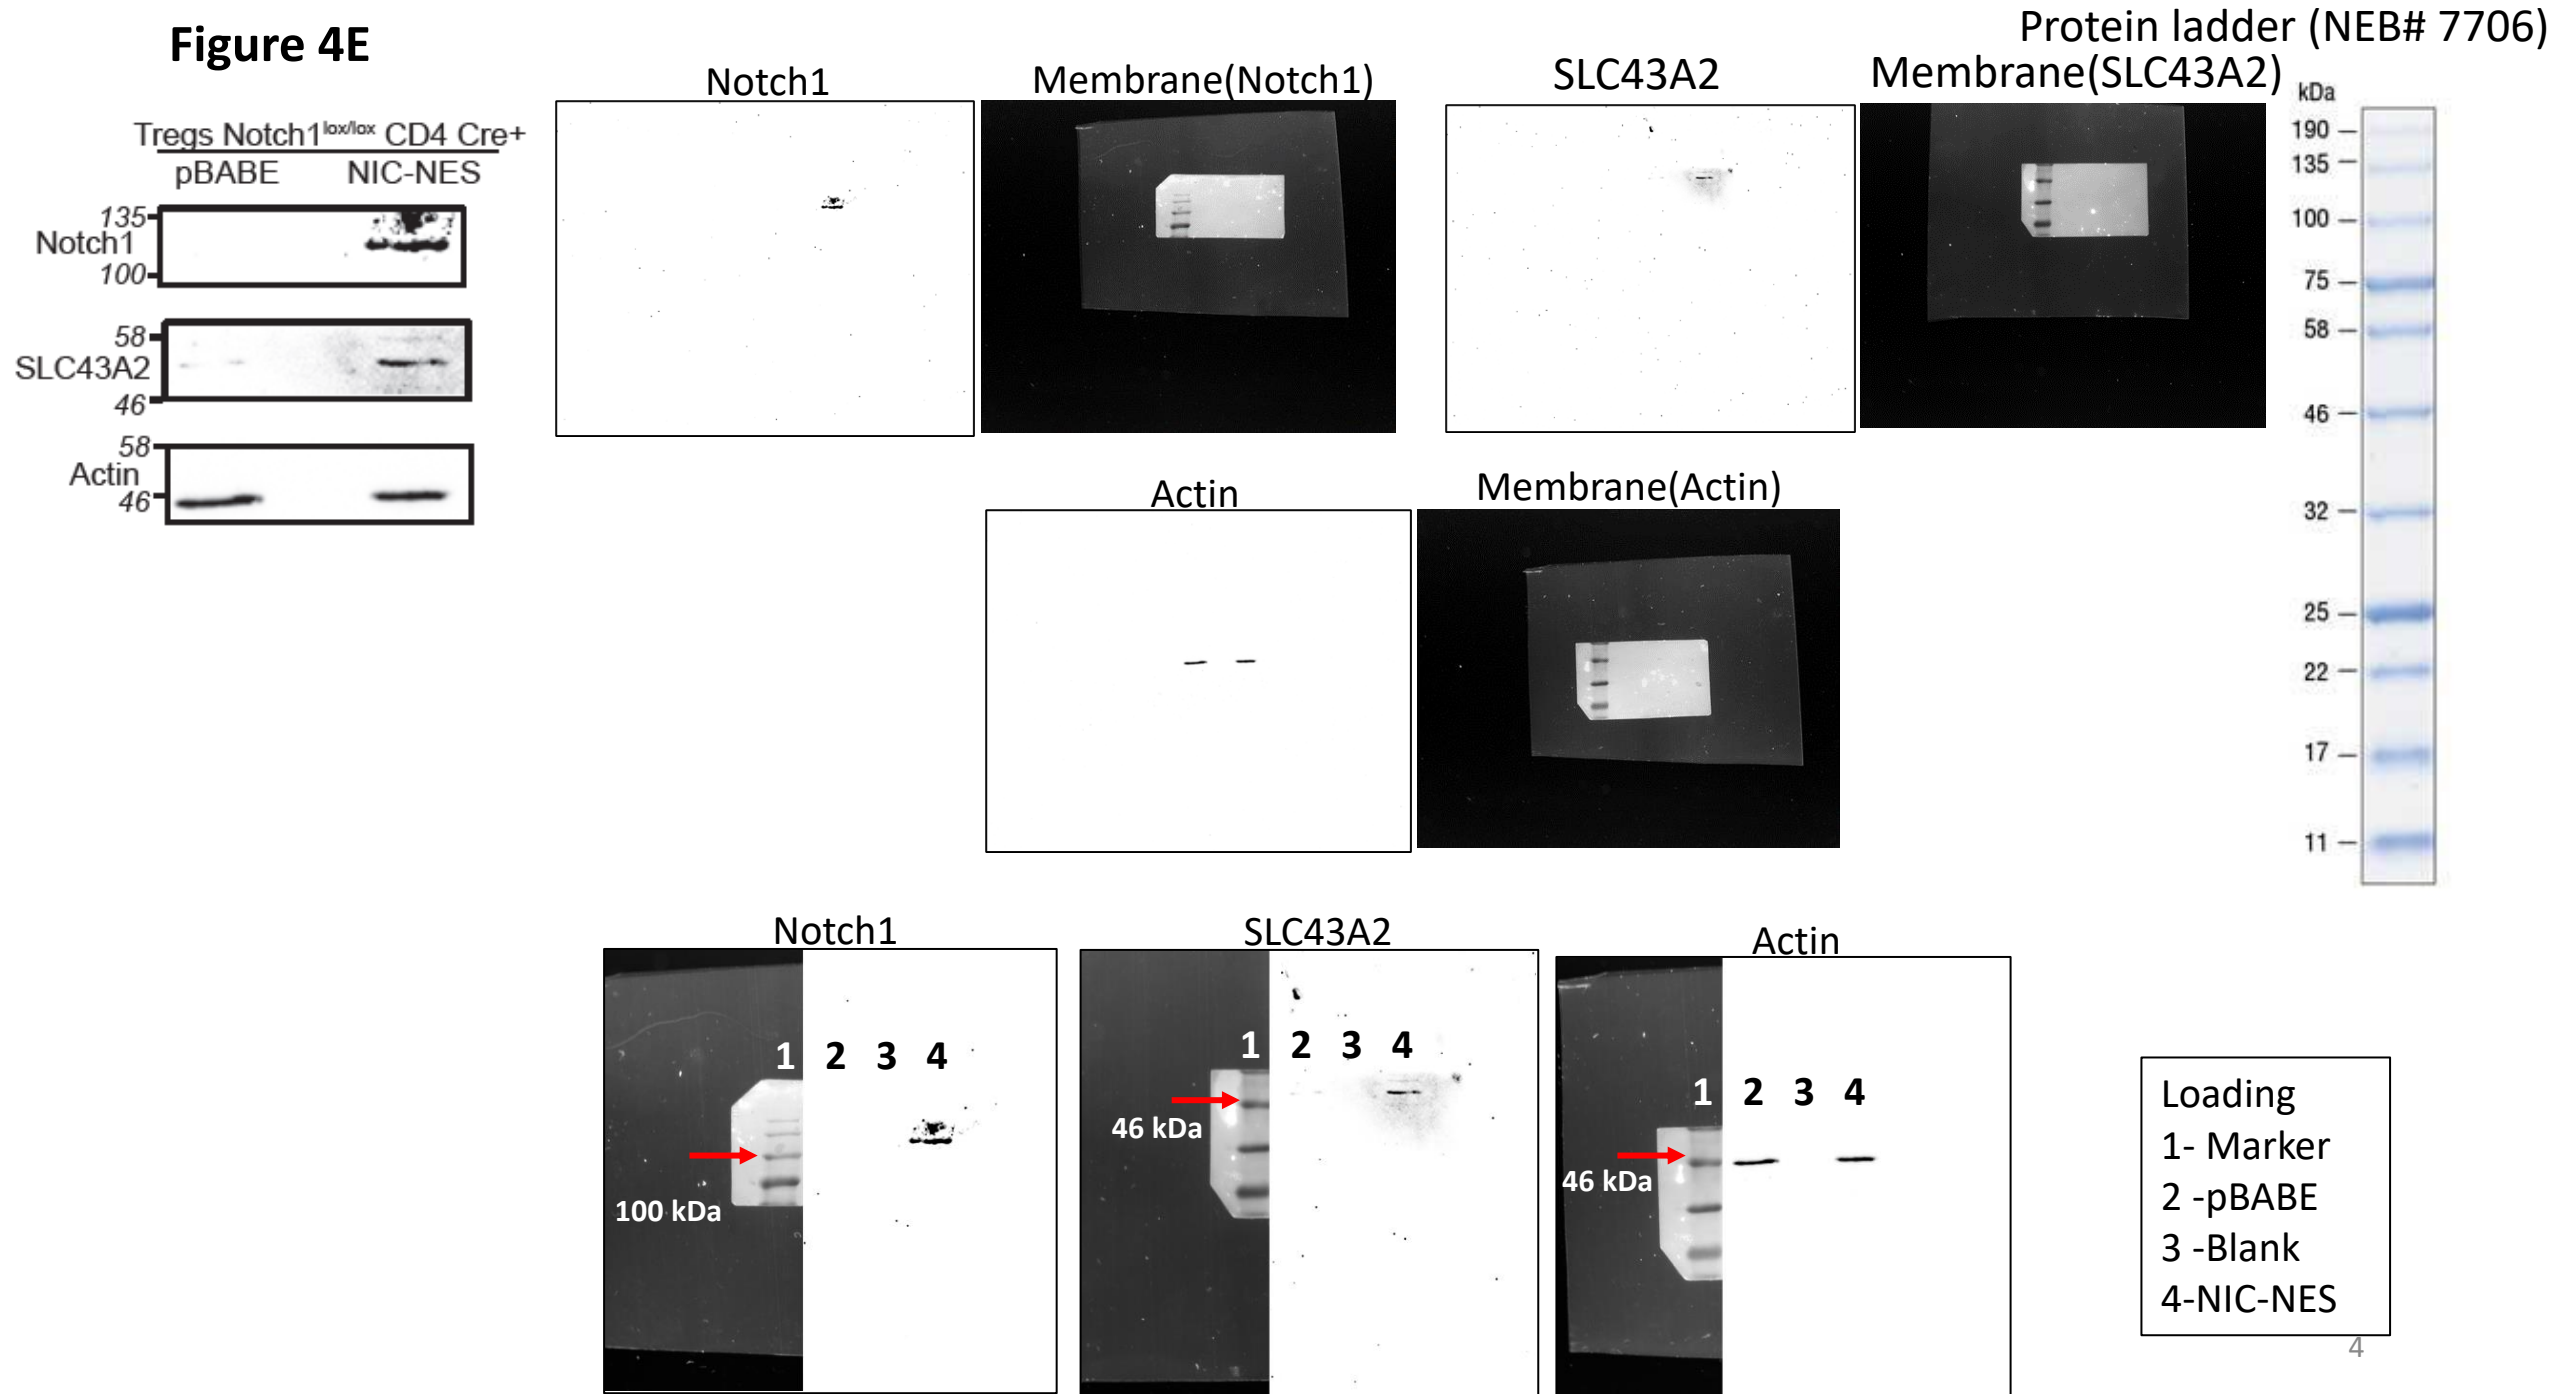

Fig S3

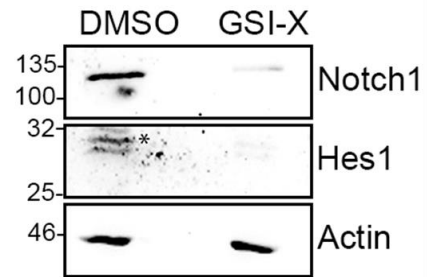

Actin

Membrane (Actin)

Hes 1

Membrane (Hes1)

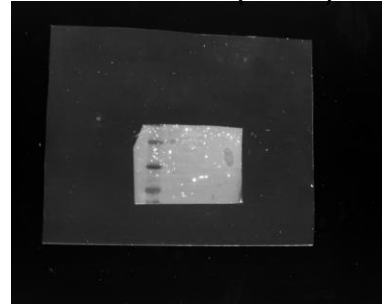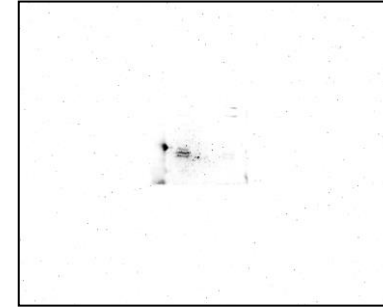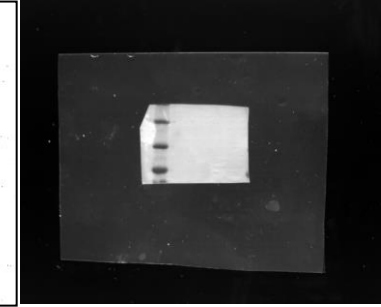

kDa

190

135

100

75

58

46

32

25

22

17

11

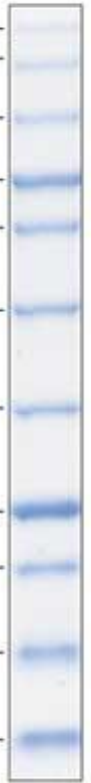

Notch 1

Membrane (Notch1)

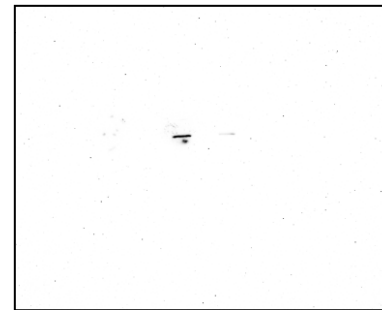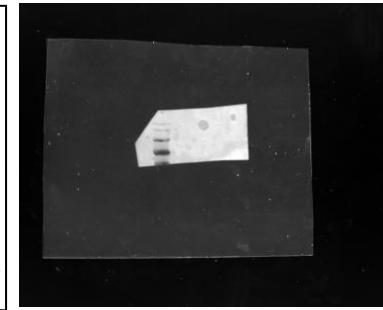

## Loading

- 1- Marker
- 2 -DMSO
- 3 -Blank
- 4- GSI-X

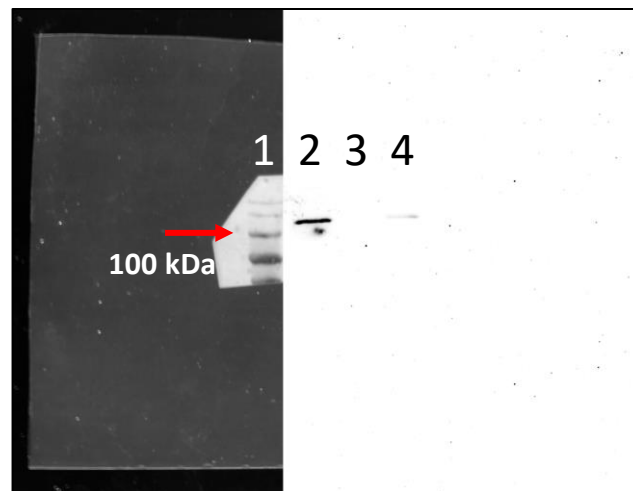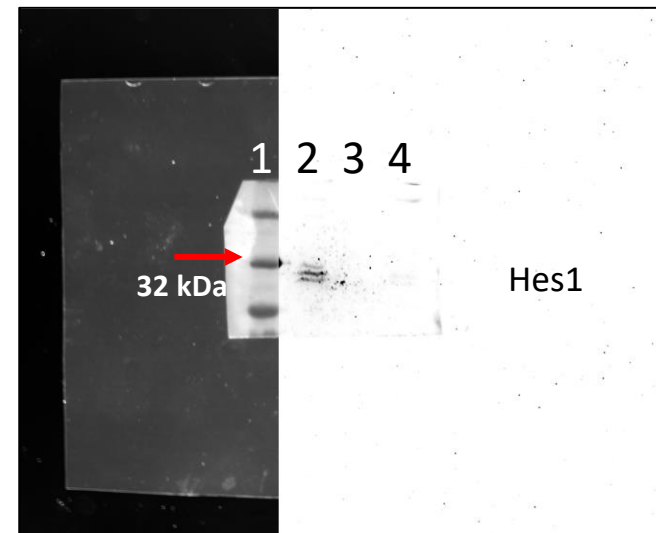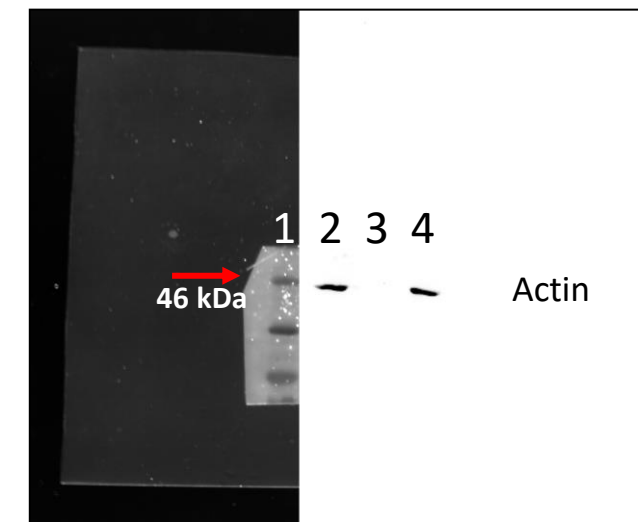



**Fig S4B**

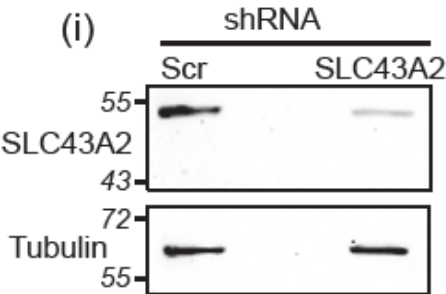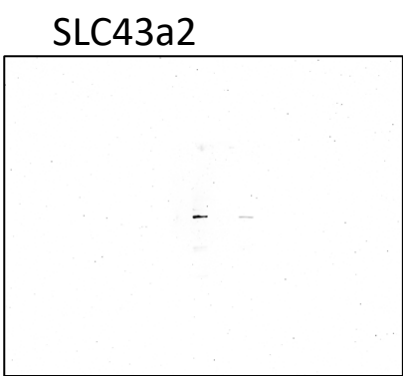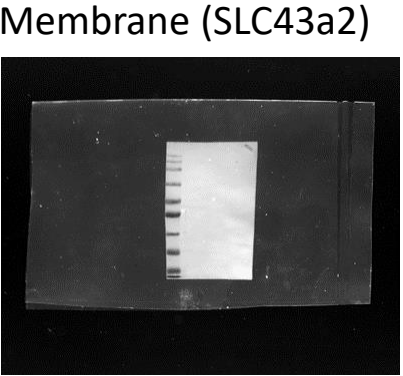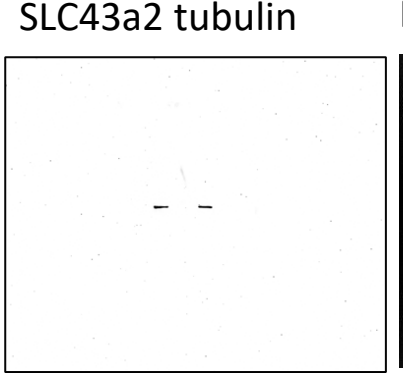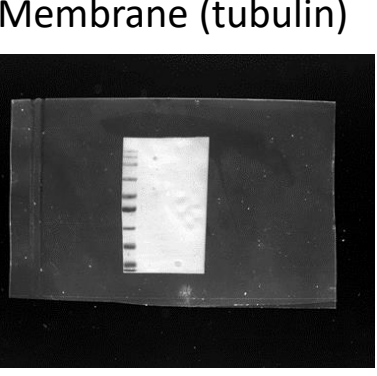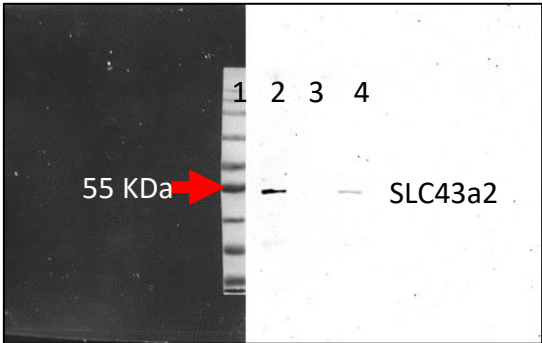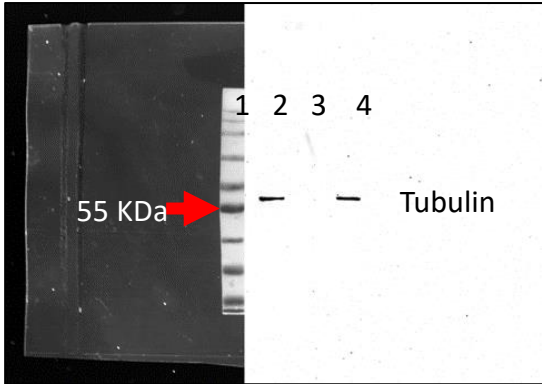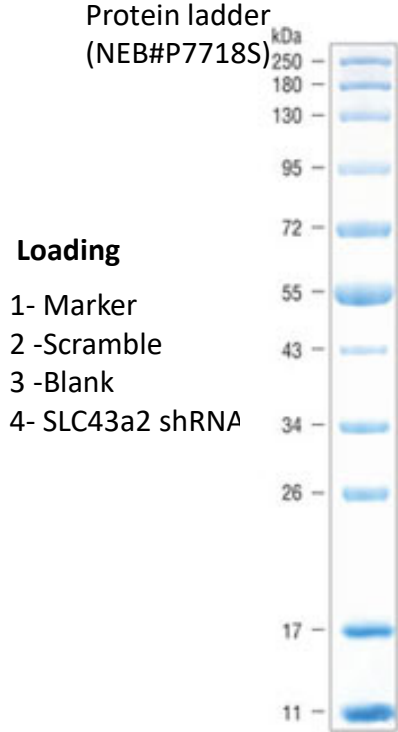

**Fig S4C**

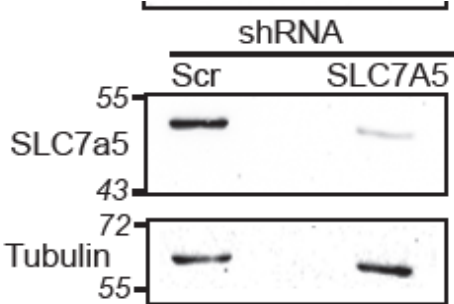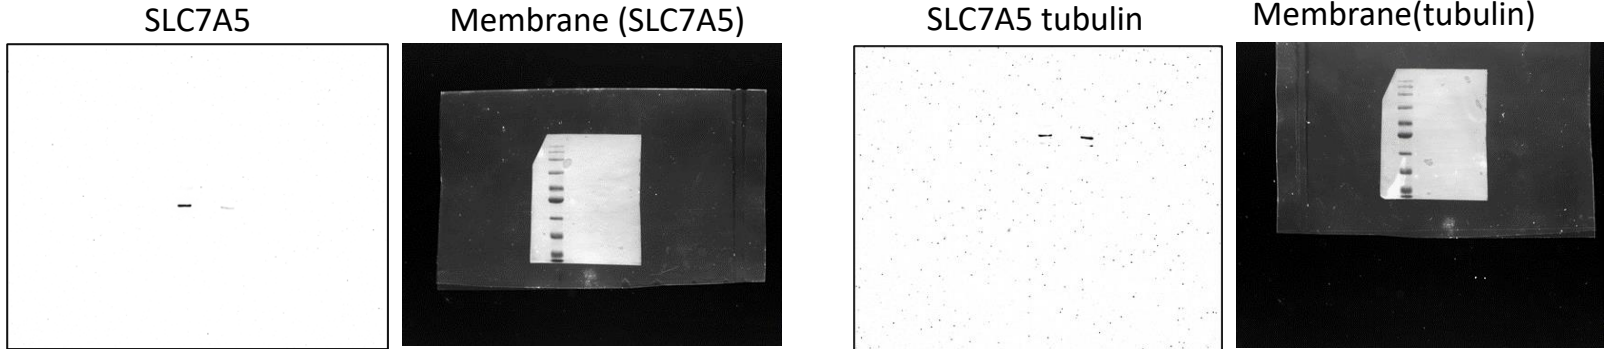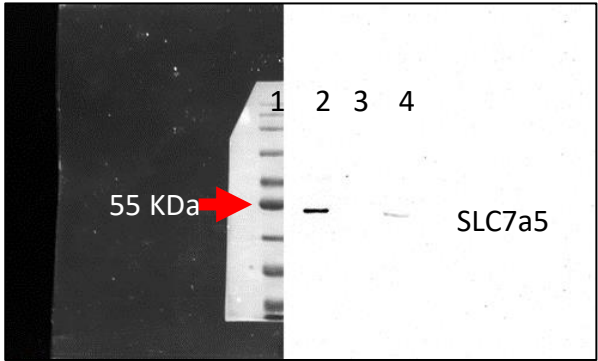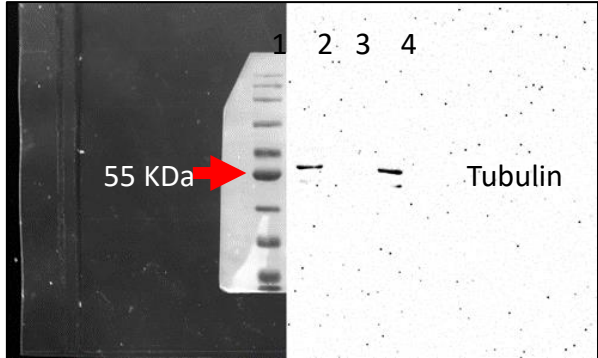

**Loading**  
1- Marker  
2 -Scramble  
3 -Blank  
4- SLC7a5 shRNA

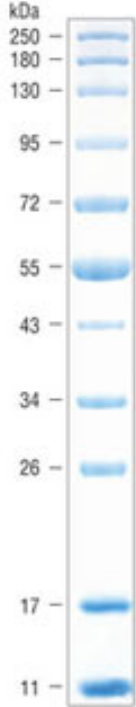

Fig S4D

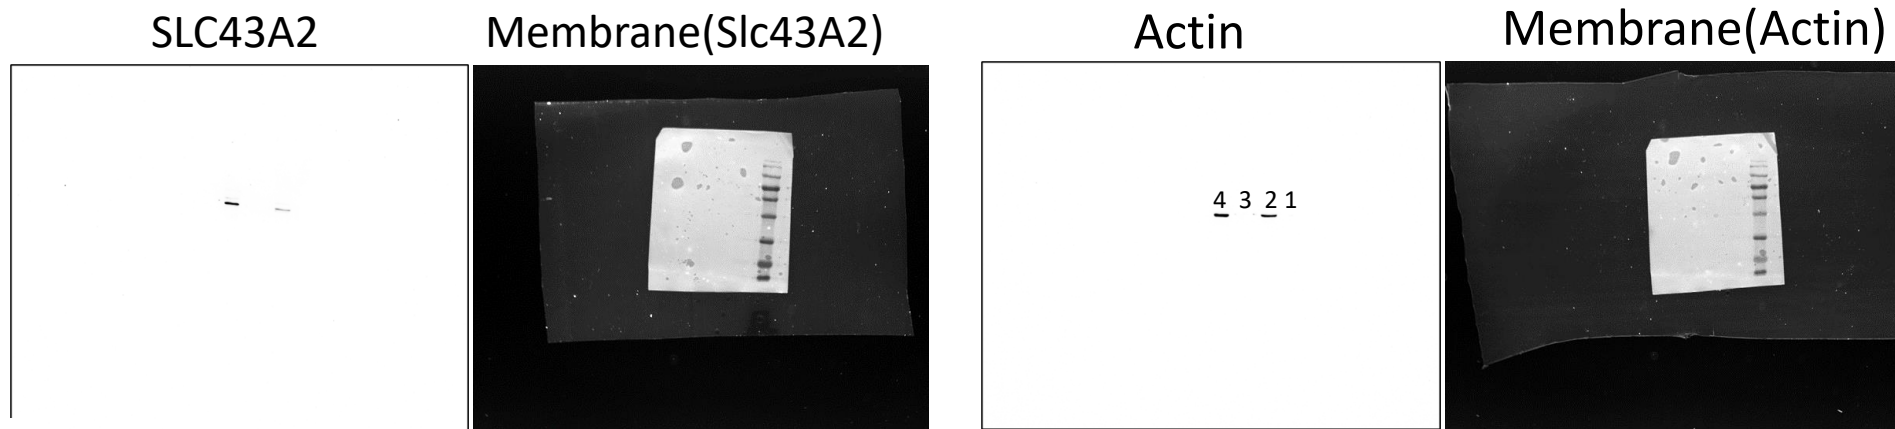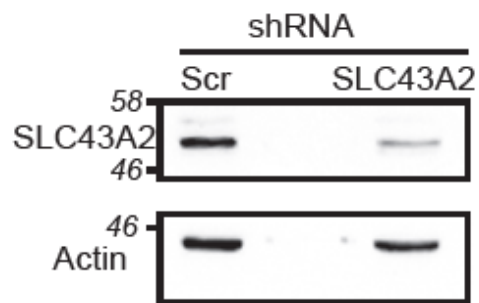

Loading  
1- Marker  
2 - SLC43a2 shRNA  
3 -Blank  
4-Scramble

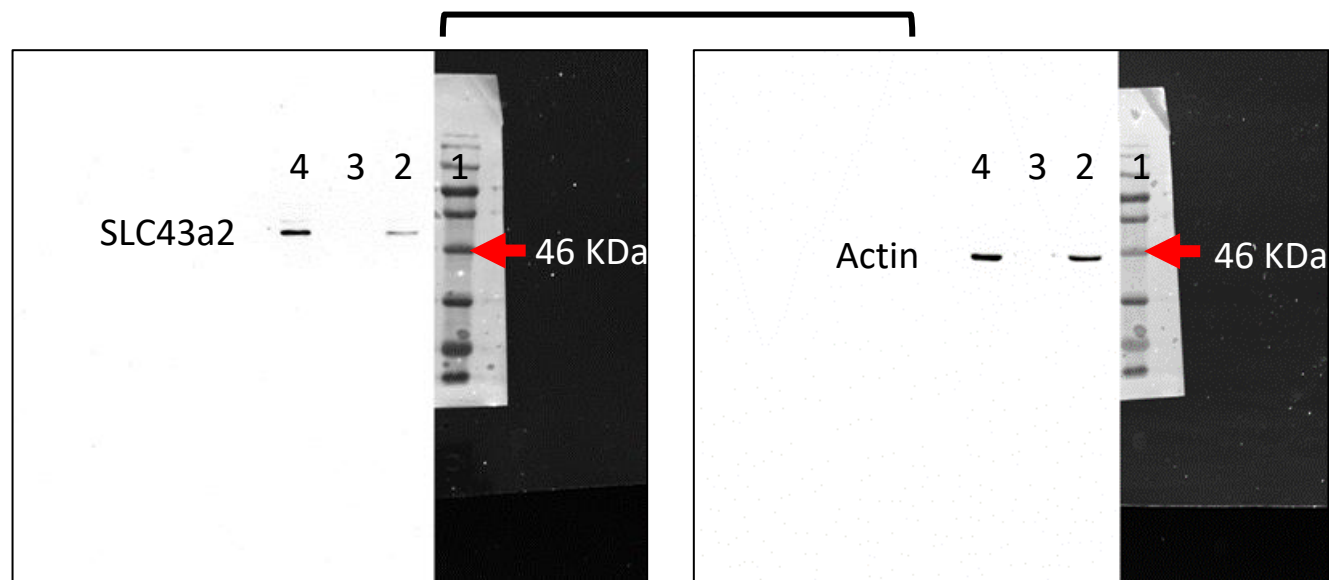

Protein ladder (NEB# 7706)

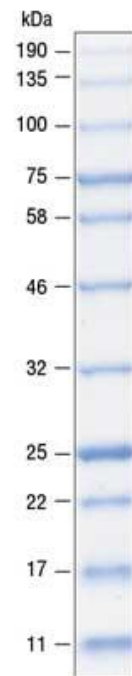



**FigS5A**

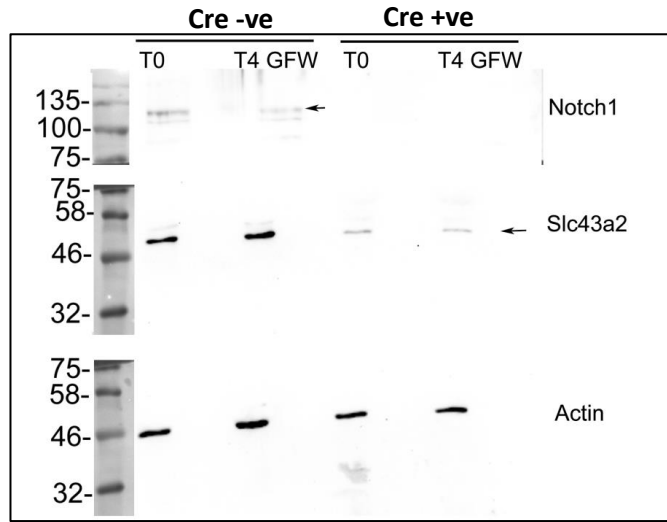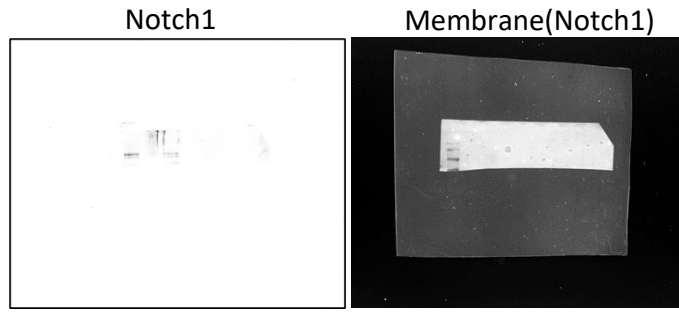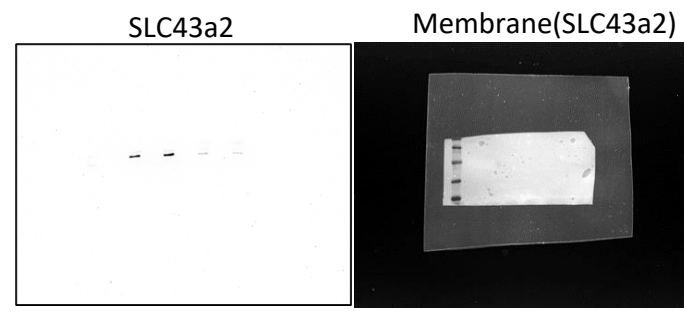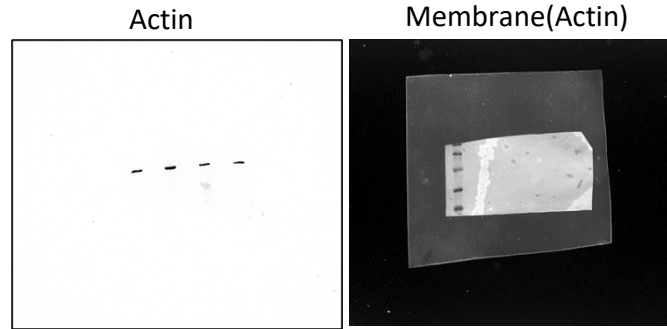

Protein ladder (NEB# 7706)

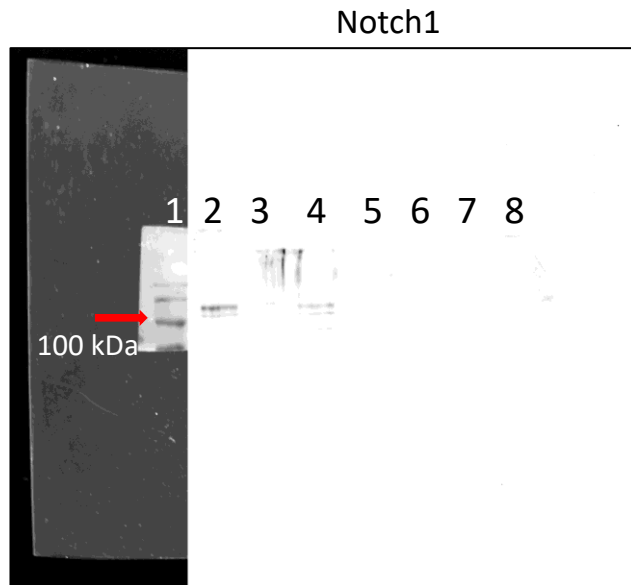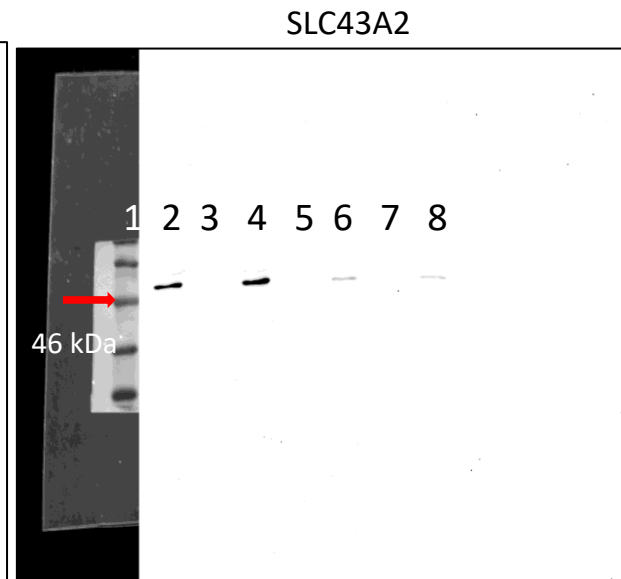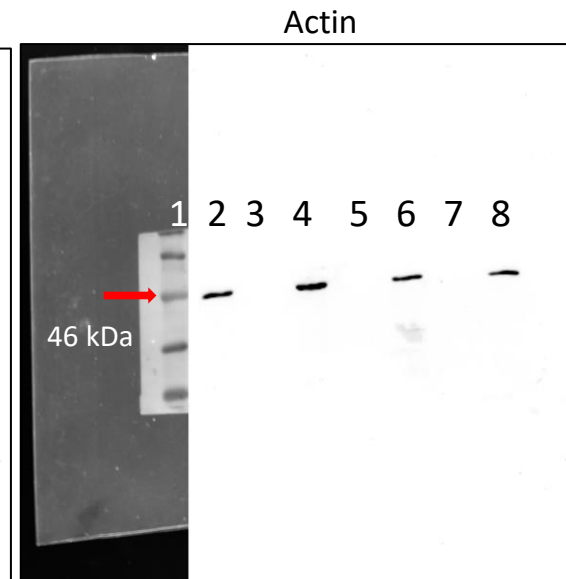

- Loading
- 1- Marker
- 2-Cre-ve (T0)
- 3-Blank
- 4-Cre-ve (T4)
- 5-Blank
- 6-Cre+ve(T0)
- 7-Blank
- 8-Cre+ve(T4)

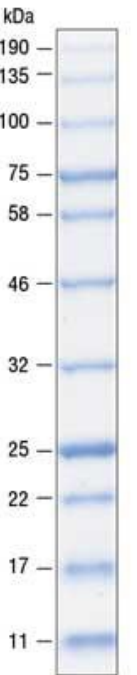

**Fig S5B**

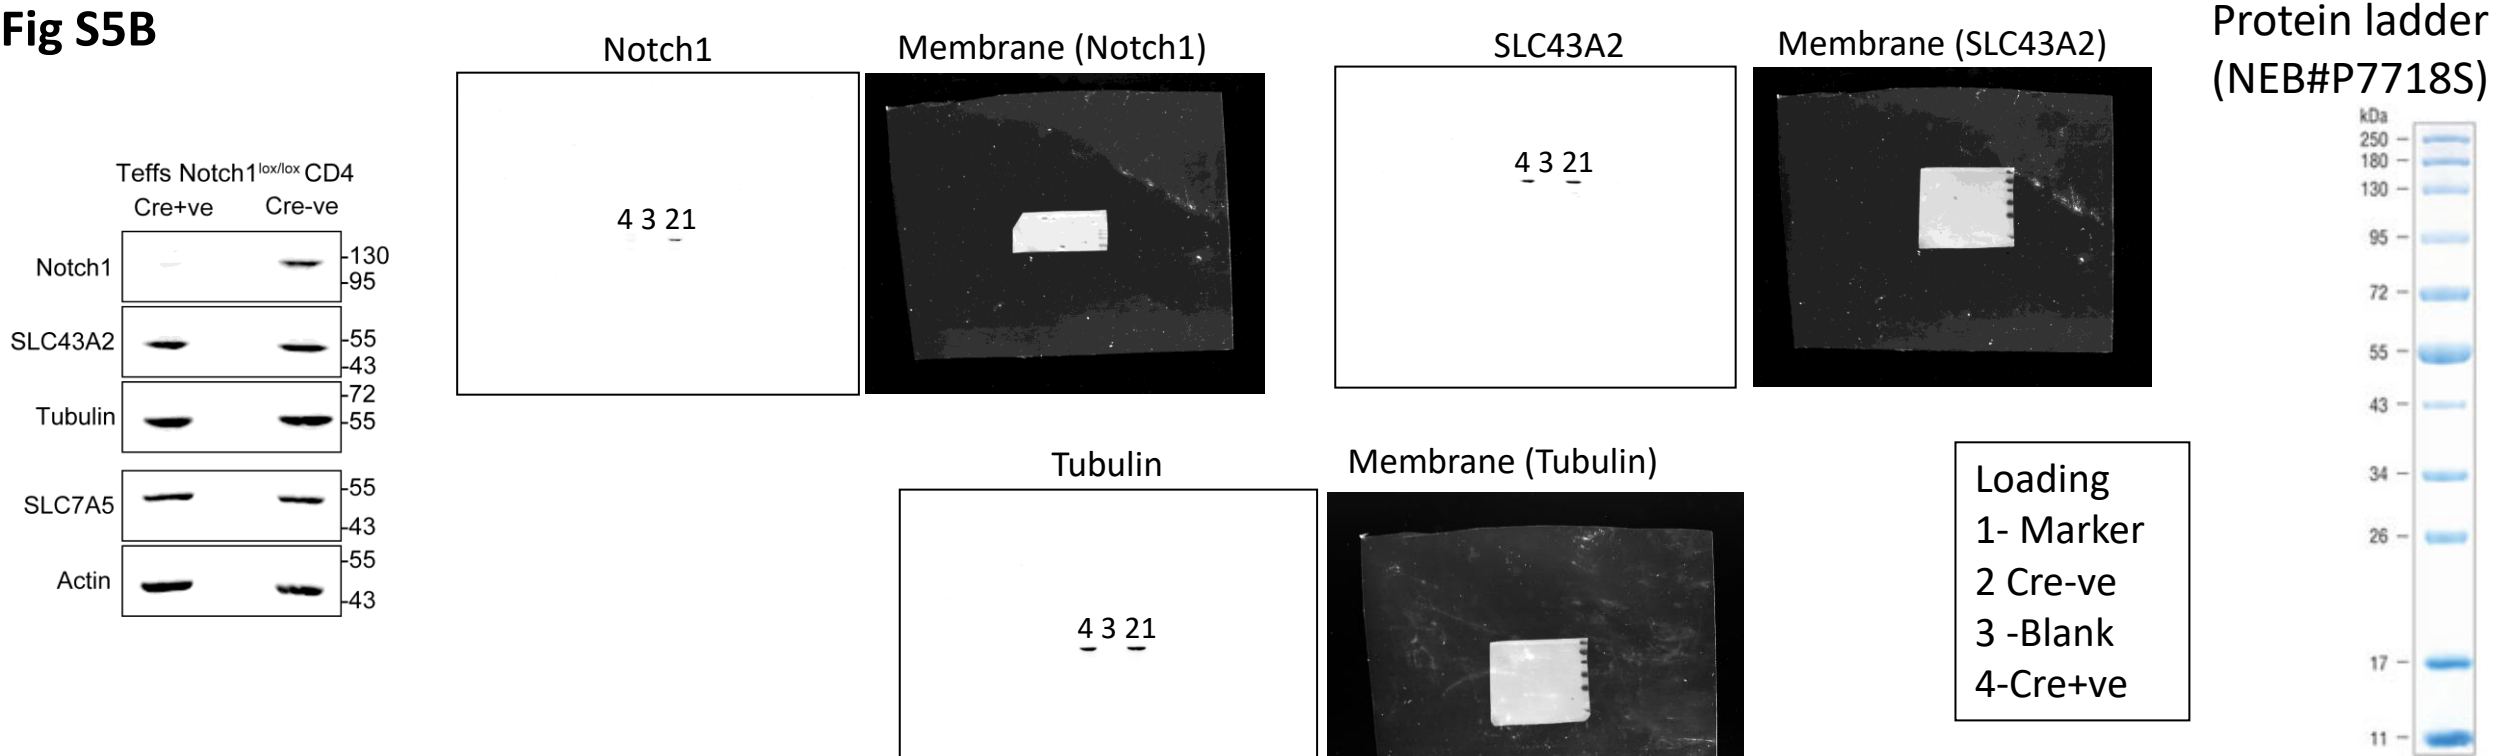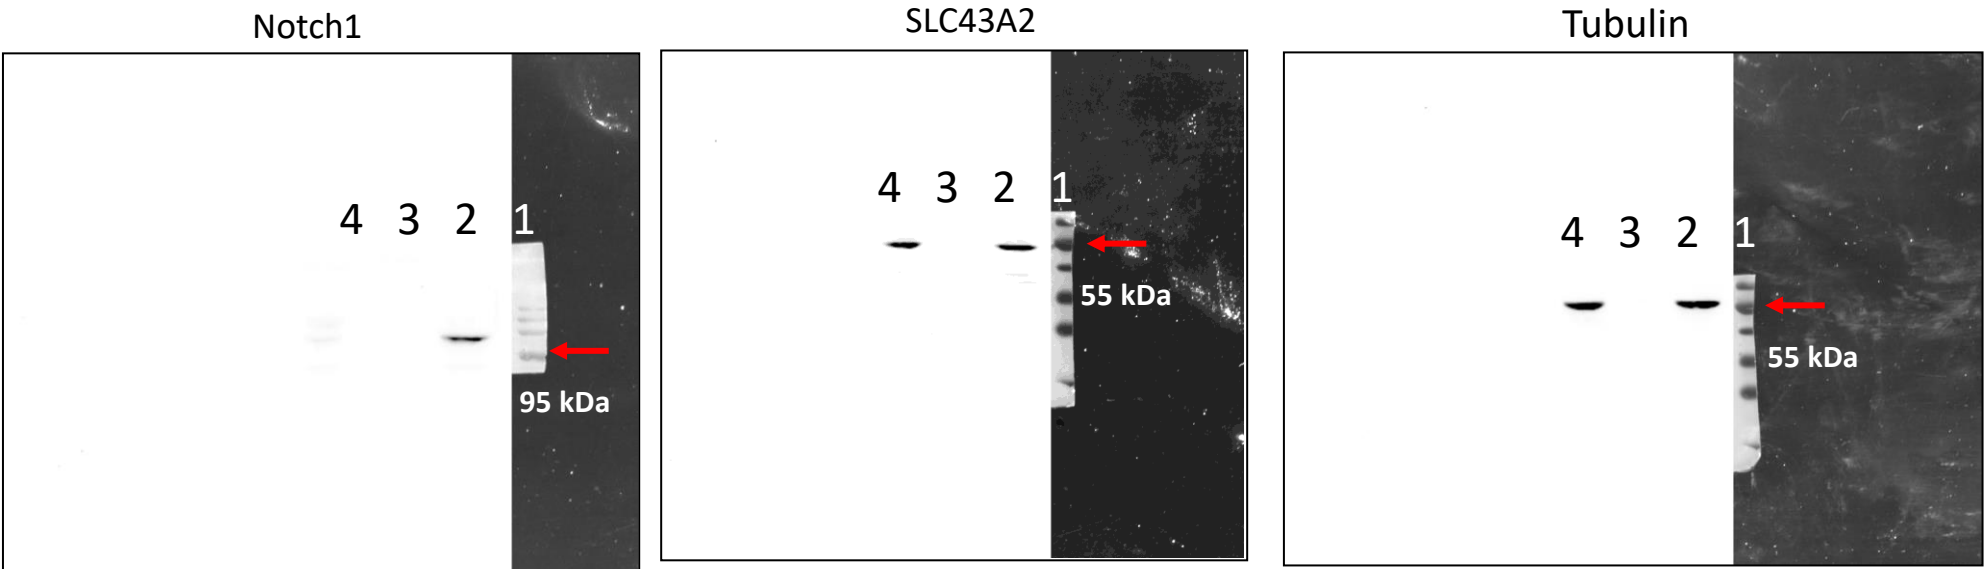

**Fig. S5Ci**

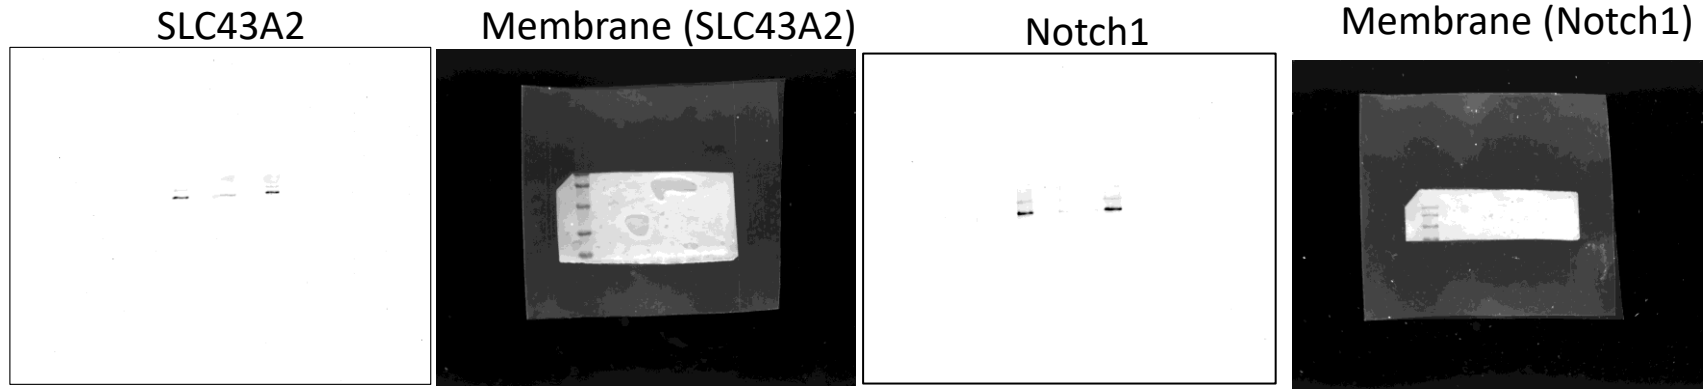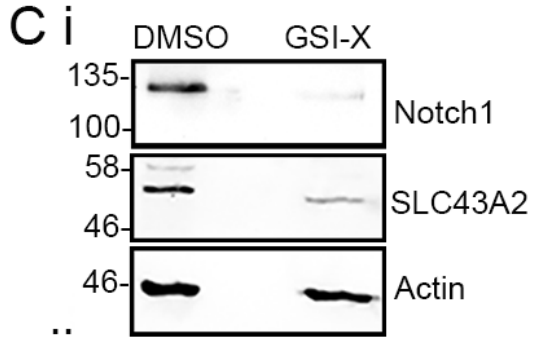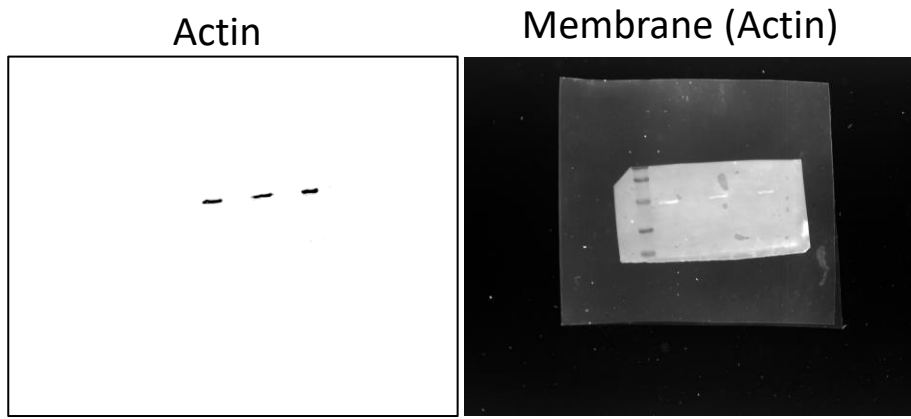

Protein ladder (NEB# 7706)

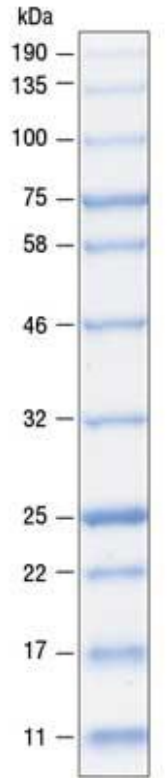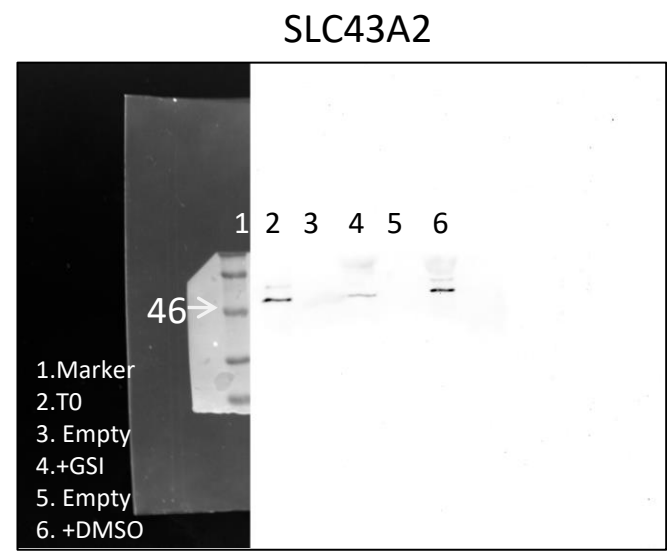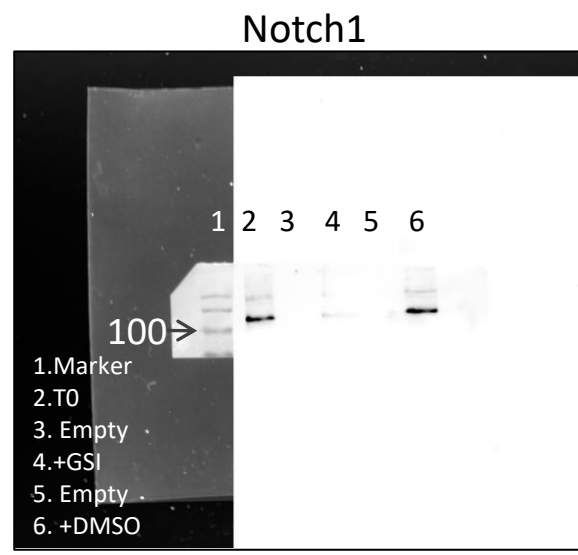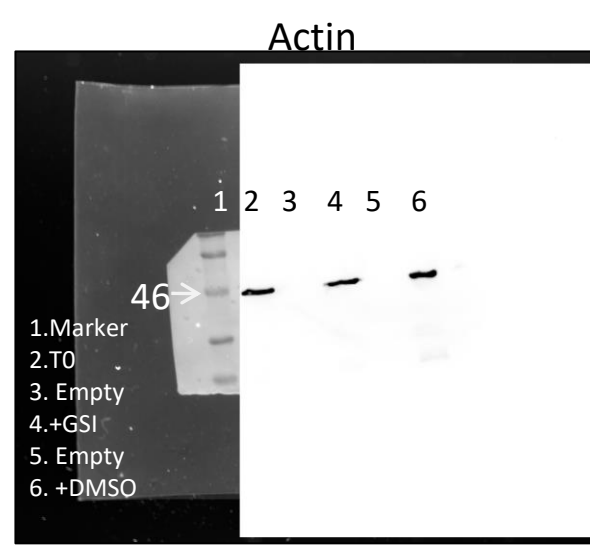

**Fig. S5Cii**

ii

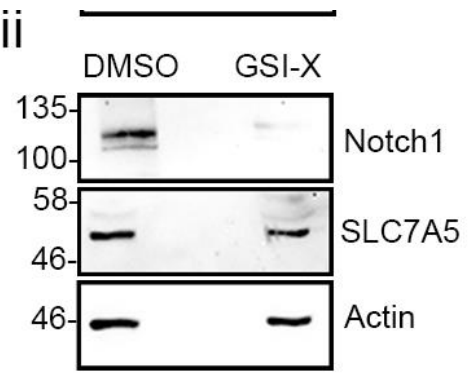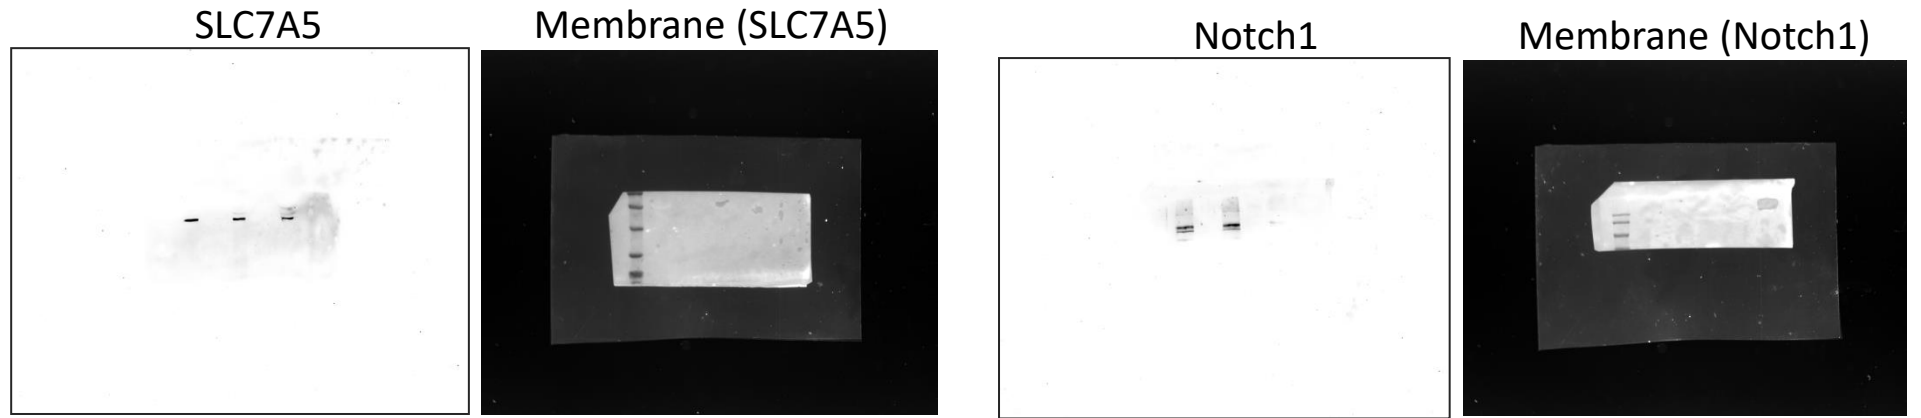

Protein ladder (NEB# 7706)

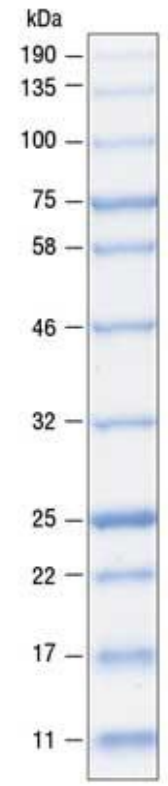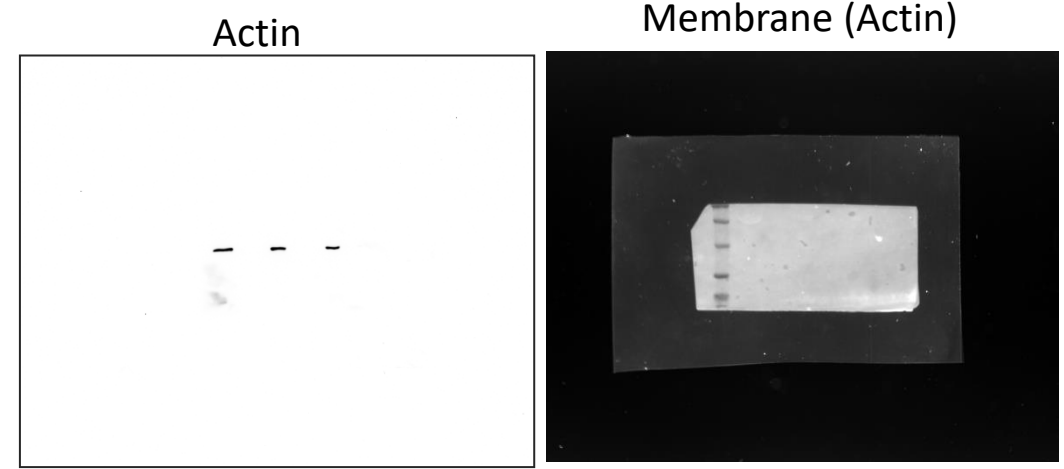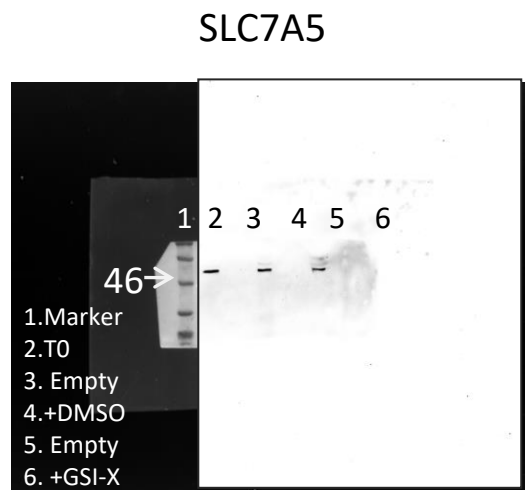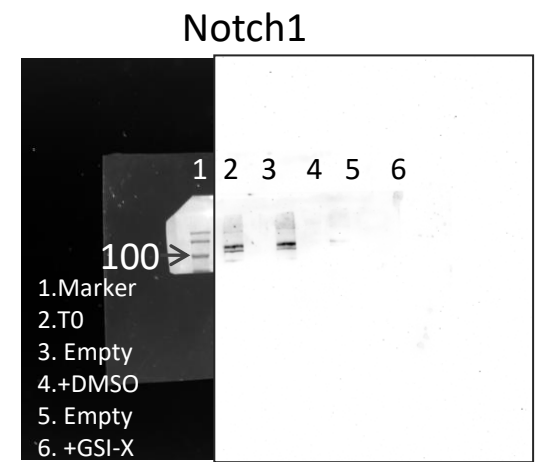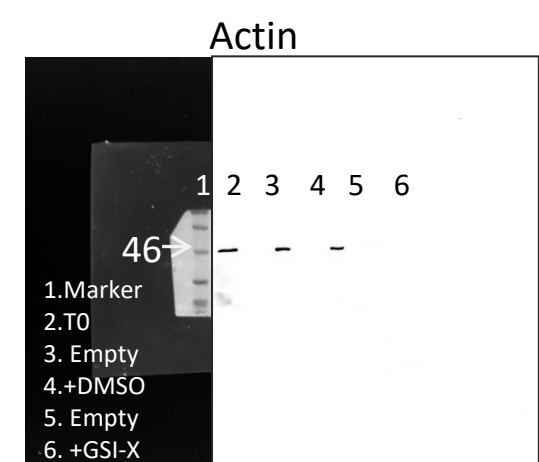

**Fig S5D**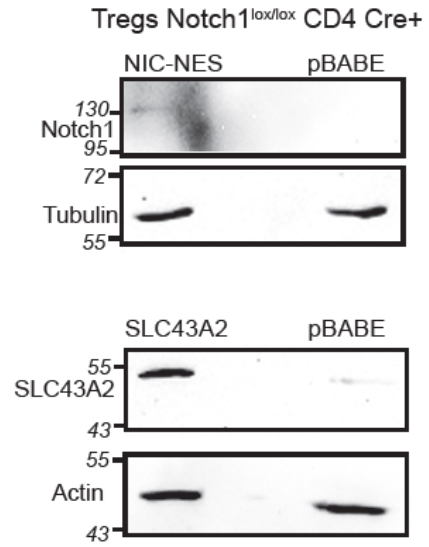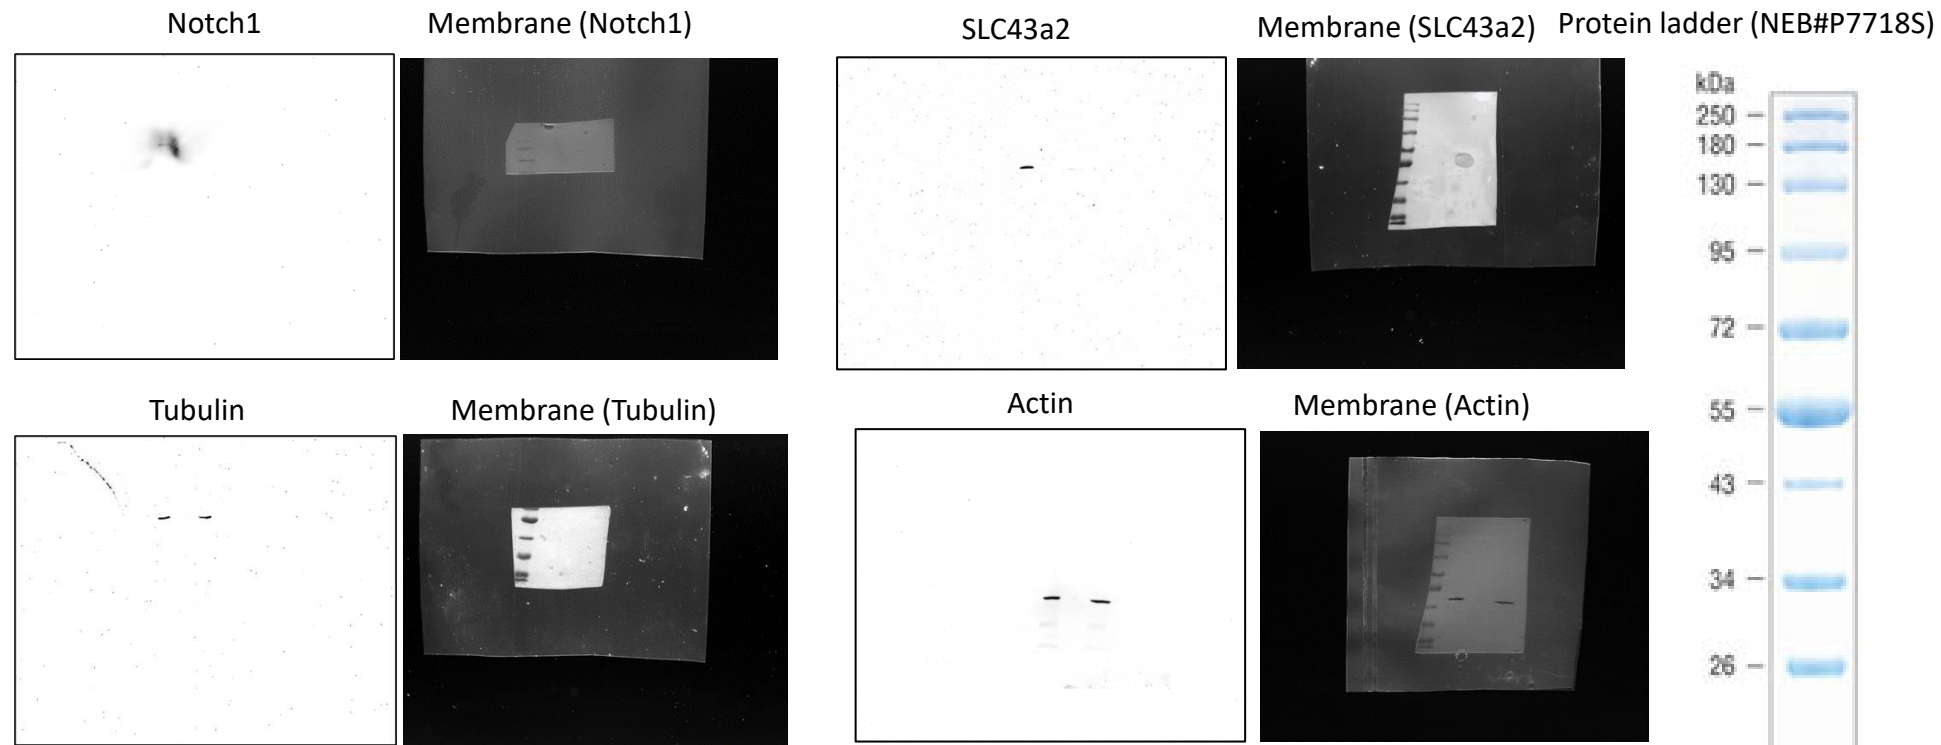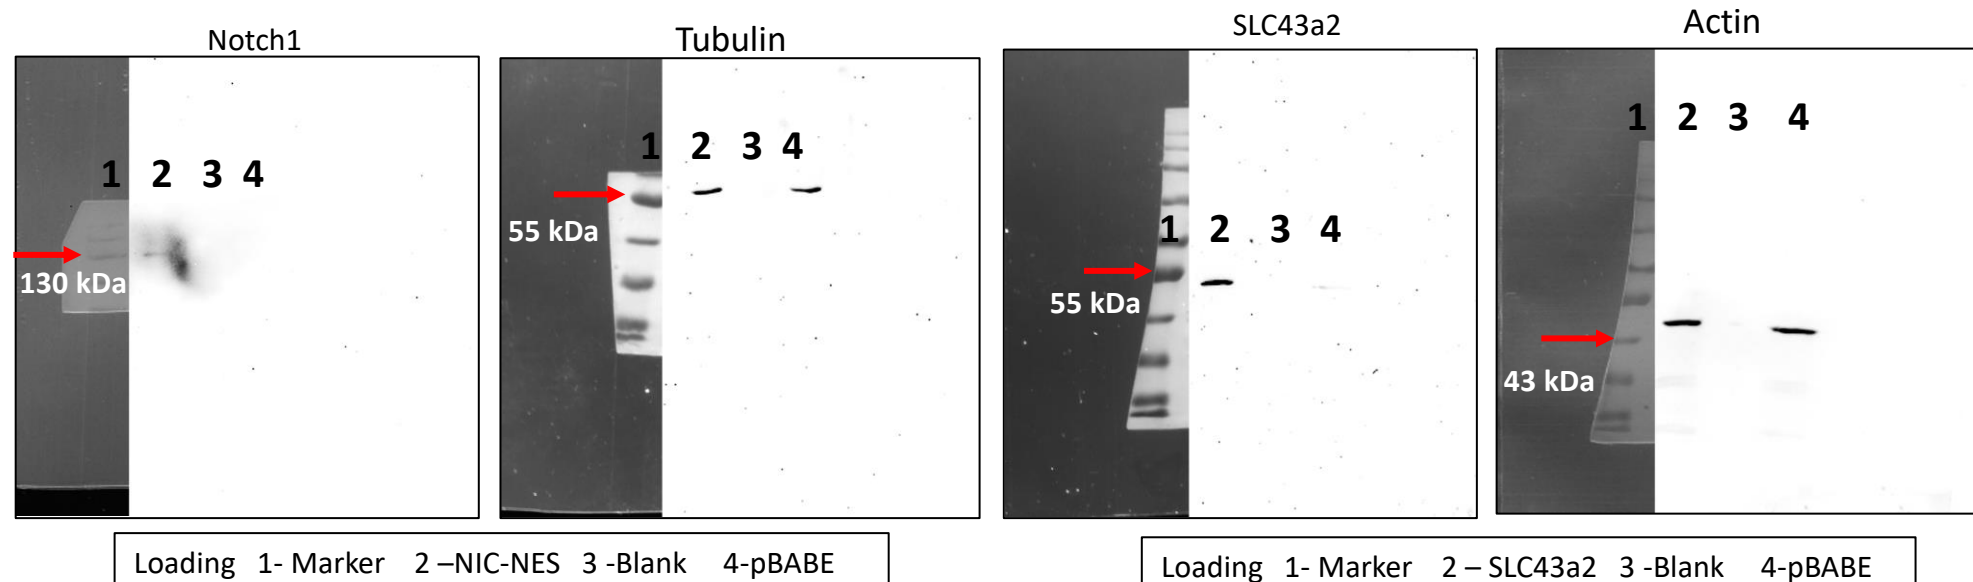



Fig S2

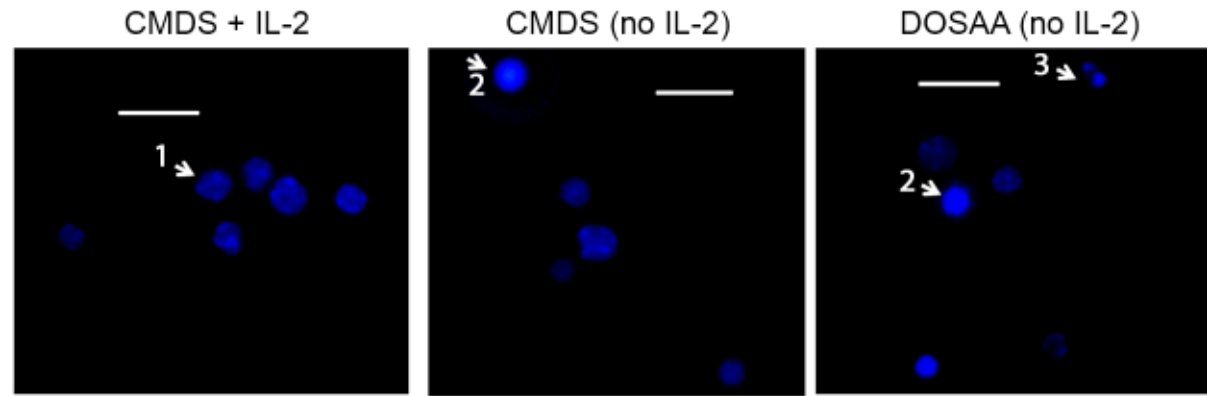

Arrowhead shows dead cell  
Scale bar: 10μm

- 1. Live nucleus
  - 2. Chromatin condensation
  - 3. Nuclear fragmentation
- Apoptotic nuclei

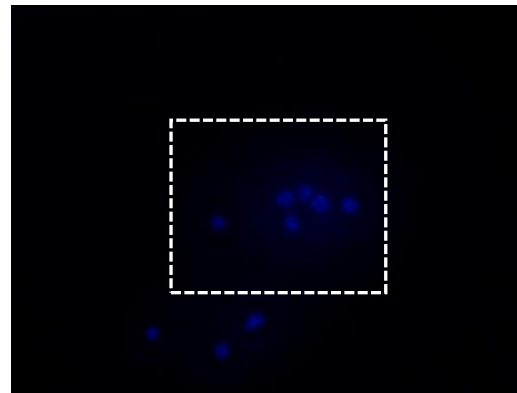

CMDS IL2

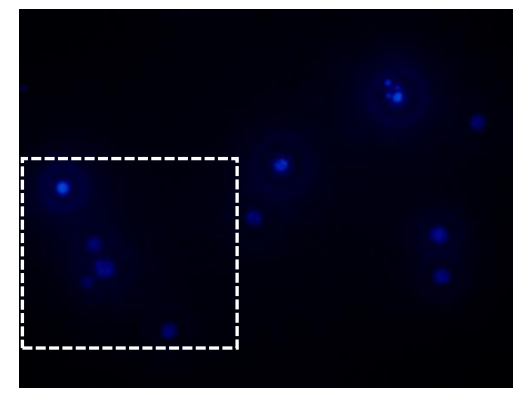

CMDS\_3

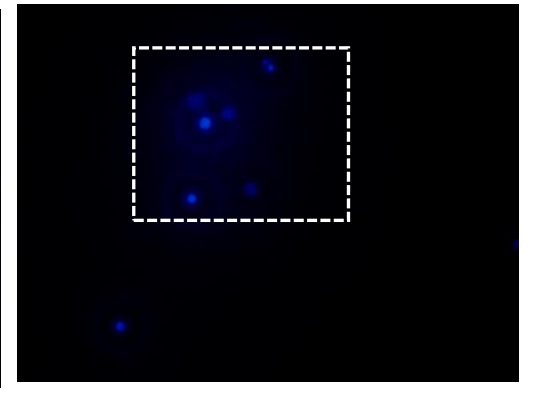

DoSAA\_4

CMDS = CMDS no IL-2

DOSAA = DOSAA no IL-2

**Fig S4E**

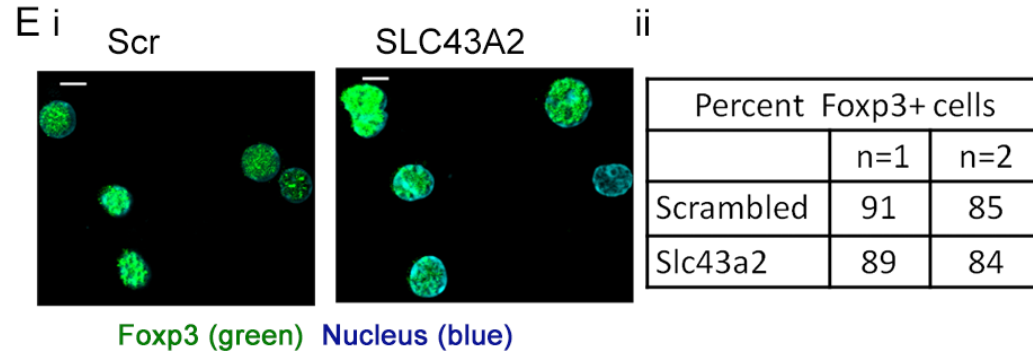

Scale bar: 5 $\mu$ m

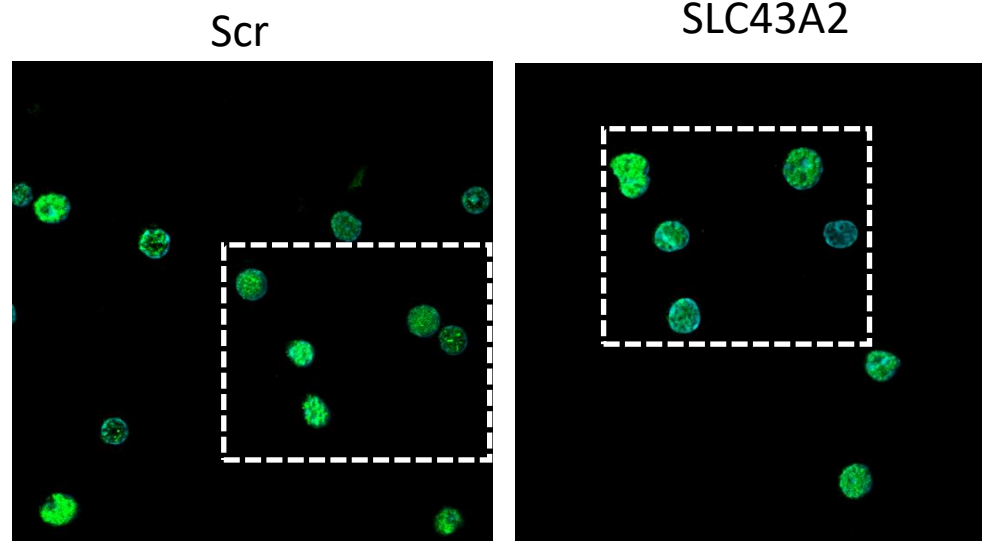

# Fig 2D

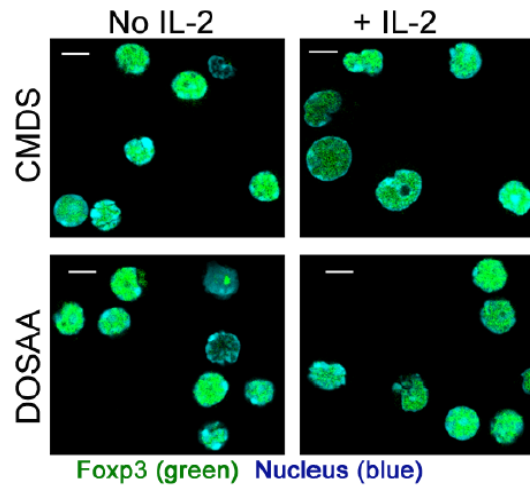

| Percent FoXP3+ cells |      |      |
|----------------------|------|------|
|                      | n=1  | n=2  |
| CMDS no IL-2         | 87.6 | 87.7 |
| CMDS + IL-2          | 80.4 | 85.0 |
| DOSAA no IL-2        | 81.6 | 79.8 |
| DOSAA + IL-2         | 73.7 | 76.1 |

Scale bar: 5µm

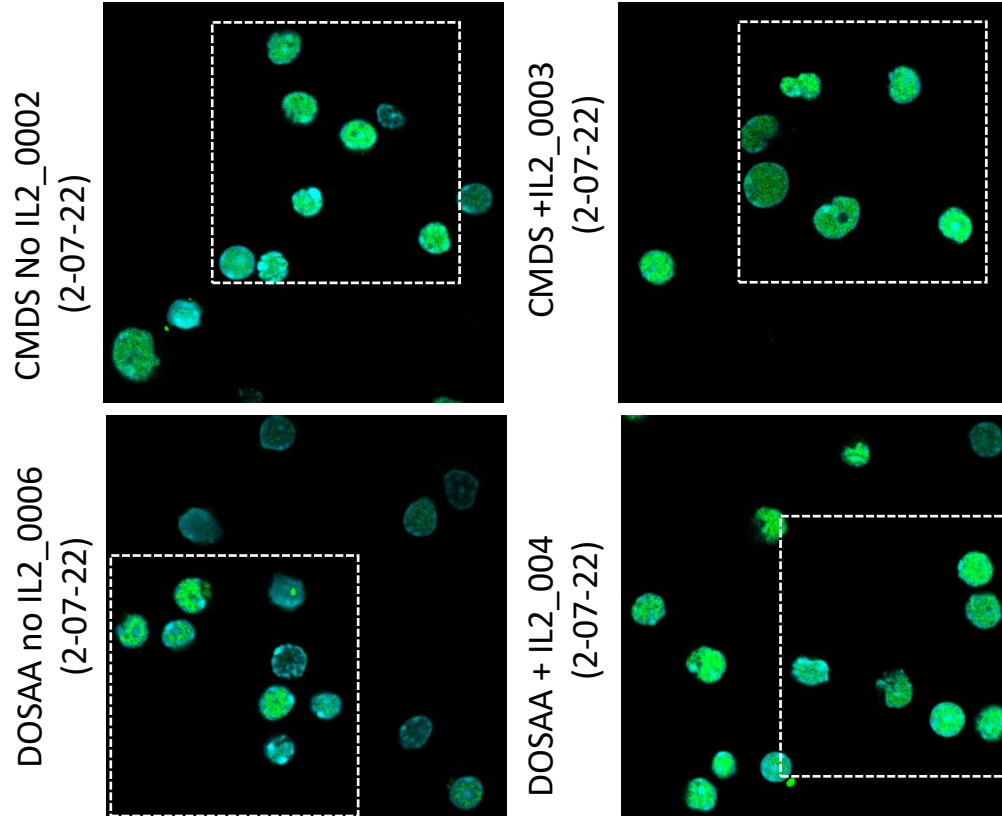

Supplement: inline-supplementary-material-3 [file inline-supplementary-material-3.pdf]
